# Supplementary material for: The Emerging Role of Sperm-Associated Antigen 6 Gene in the Microtubule Function of Cells and Cancer
Source: PubMed Central journal article supplement (PMC6807308; doi:10.1016/j.omto.2019.08.011), 2019-09-10
Supplement: mmc1.pdf [file mmc1.pdf]

**OMTO, Volume 15**

**Supplemental Information**

**The Emerging Role of Sperm-Associated  
Antigen 6 Gene in the Microtubule Function  
of Cells and Cancer**

**Da-Fang Zheng, Qi Wang, Jing-Ping Wang, Zheng-Qi Bao, Shi-Wu Wu, Li Ma, Da-Min  
Chai, Z. Peter Wang, and Yi-Sheng Tao**

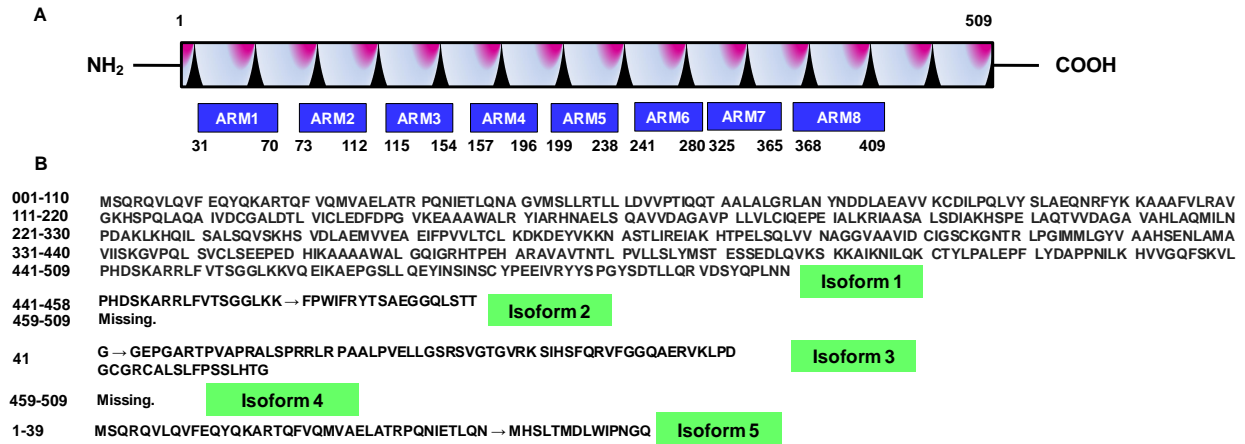

Supplementary figure 1: The structure and the sequences of SPAG6 are illustrated. A, SPAG6 protein has eight ARM domains. B, SPAG6 protein has five isoforms with different sequences.
